# Supplementary material
Source: PubMed Central journal article supplement (PMC3780969)
Supplement: NIHMS397165-supplement-3.pdf [file NIHMS397165-supplement-3.pdf]

## Gene Set Overlap Analysis

## Genes underlying the enrichment signature

### A Early Responding Genes (Temporal Profile Cluster 1)

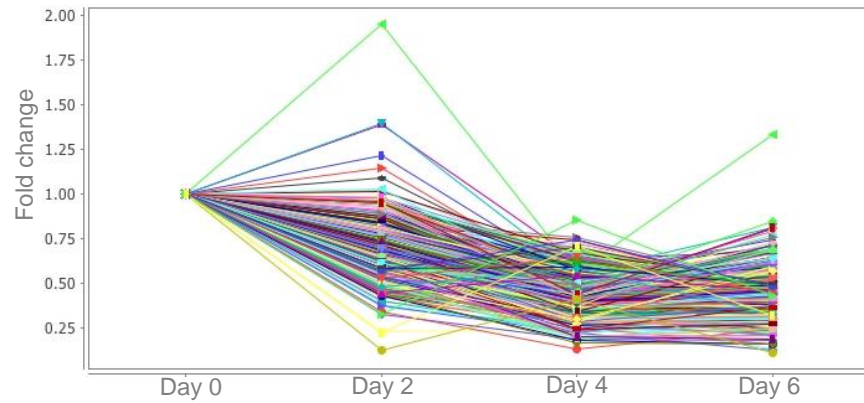

| Gene Set Name [# Genes (K)]                                                                      | Description                                                                                                      | # Genes in Overlap (k) | p value              |
|--------------------------------------------------------------------------------------------------|------------------------------------------------------------------------------------------------------------------|------------------------|----------------------|
| KEGG_HEDGEHOG_SIGNALING_PATHWAY [56]                                                             | Hedgehog signaling pathway                                                                                       | 7                      | 9.19 e <sup>-3</sup> |
| KEGG_WNT_SIGNALING_PATHWAY [151]                                                                 | Wnt signaling pathway                                                                                            | 13                     | 1.2 e <sup>-2</sup>  |
| REACTOME_AKT_PHOSPHORYLATES_TARGETS_IN_THE_CYTOSOL [14]                                          | Genes involved in AKT phosphorylates targets in the cytosol                                                      | 3                      | 1.97 e <sup>-2</sup> |
| KEGG_GLYCOSPHINGOLIPID_BIOSYNTHESIS_LACTO_AND_NEOLACTO_SERIES [26]                               | Glycosphingolipid biosynthesis – lacto and neolacto series                                                       | 4                      | 2.3 e <sup>-2</sup>  |
| SA_FAS_SIGNALING [6]                                                                             | The TNF-type receptor Fas induces apoptosis on ligand binding                                                    | 2                      | 2.42 e <sup>-2</sup> |
| BIOCARTA_BCELLSURVIVAL_PATHWAY [16]                                                              | B cell Survival Pathway                                                                                          | 3                      | 2.84 e <sup>-2</sup> |
| ST_TUMOR_NECROSIS_FACTOR_PATHWAY [28]                                                            | Tumor Necrosis Factor Pathway                                                                                    | 4                      | 2.95 e <sup>-2</sup> |
| SA_G2_AND_M_PHASES [7]                                                                           | Cdc25 activates cdc2/cyclin B complex to induce the G2/M transition                                              | 2                      | 3.3 e <sup>-2</sup>  |
| REACTOME_REGULATION_OF_LIPID_METABOLISM_BY_PEROXISOME_PROLIFERATOR_ACTIVATED_RECEPTOR_ALPHA [61] | Genes involved in regulation of lipid metabolism by peroxisome proliferator-activated receptor alpha (PPARalpha) | 6                      | 4.44 e <sup>-2</sup> |
| REACTOME-PI3K-AKT-SIGNALING [37]                                                                 | Genes involved in PI3K/AKT signaling                                                                             | 4                      | 7.09 e <sup>-2</sup> |

GSK3B PDPK1  
 CSNK1A1 B3GNT5  
 PRKACB FUT9  
 PRKX FUT4  
 CSNK1E ST3GAL4  
 CSNK1G1 CASP3  
 HHP CFLAR  
 CREBBP FOS  
 TBL1X ZBTB7A  
 TBL1XR1 NR2C2  
 CCND2 RALBP1  
 AXIN2 CDC25A  
 LRP6 NCOR1  
 ROCK1 PPARA  
 PPP2R5E FADS2  
 CDKN1A IRS2

### B Mid-to-Late Responding Genes (Temporal Profile Cluster 2)

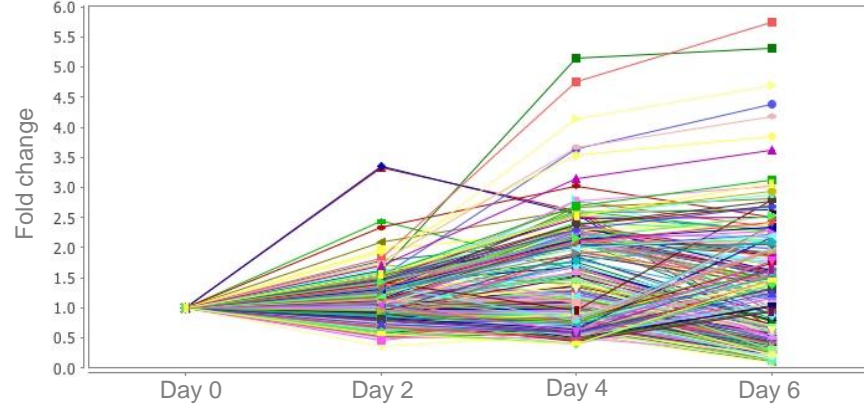

| Gene Set Name [# Genes (K)]                                        | Description                                                     | # Genes in Overlap (k) | p value              |
|--------------------------------------------------------------------|-----------------------------------------------------------------|------------------------|----------------------|
| KEGG_GLYCOSPHINGOLIPID_BIOSYNTHESIS_LACTO_AND_NEOLACTO_SERIES [26] | Glycosphingolipid biosynthesis – lacto and neolacto series      | 6                      | 2.2 e <sup>-4</sup>  |
| REACTOME_DOPAMINE_NEUROTRANSMITTER_RELEASE_CYCLE [14]              | Genes involved in dopamine neurotransmitter release cycle       | 4                      | 1.11 e <sup>-3</sup> |
| REACTOME_SEROTONIN_NEUROTRANSMITTER_RELEASE_CYCLE [14]             | Genes involved in serotonin neurotransmitter release cycle      | 4                      | 1.11 e <sup>-3</sup> |
| REACTOME_GLUTAMATE_NEUROTRANSMITTER_RELEASE_CYCLE [28]             | Genes involved in glutamate neurotransmitter release cycle      | 4                      | 1.47 e <sup>-3</sup> |
| REACTOME_NEUROTRANSMITTER_RELEASE_CYCLE [28]                       | Genes involved in neurotransmitter release cycle                | 5                      | 2.55 e <sup>-3</sup> |
| REACTOME_ACETYLCHOLINE_NEUROTRANSMITTER_RELEASE_CYCLE [11]         | Genes involved in acetylcholine neurotransmitter release cycle  | 3                      | 5.66 e <sup>-3</sup> |
| REACTOME_NOREPINEPHRINE_NEUROTRANSMITTER_RELEASE_CYCLE [12]        | Genes involved in norepinephrine neurotransmitter release cycle | 3                      | 7.36 e <sup>-3</sup> |
| KEGG_CIRCADIAN_RHYTHM_MAMMAL [13]                                  | Circadian rhythm – mammal                                       | 3                      | 9.32 e <sup>-3</sup> |
| KEGG_GLYCOSPHINGOLIPID_BIOSYNTHESIS_GLOBO_SERIES [14]              | Glycosphingolipid biosynthesis – globo series                   | 3                      | 1.16 e <sup>-2</sup> |
| REACTOME_CALCITONIN_LIKE_LIGAND_RECEPTORS [10]                     | Genes involved in calcitonin-like ligand receptors              | 2                      | 4.65 e <sup>-2</sup> |

FUT2 HEXB  
 FUT9 RAMP1  
 ABO RAMP2  
 B3GNT5  
 FUT4  
 ST3GAL6  
 SYT1  
 SNAP25  
 RIMS1  
 DDC  
 SLC1A1  
 NR1D1  
 PER2  
 PER3

### C Late Responding Genes (Temporal Profile Cluster 3)

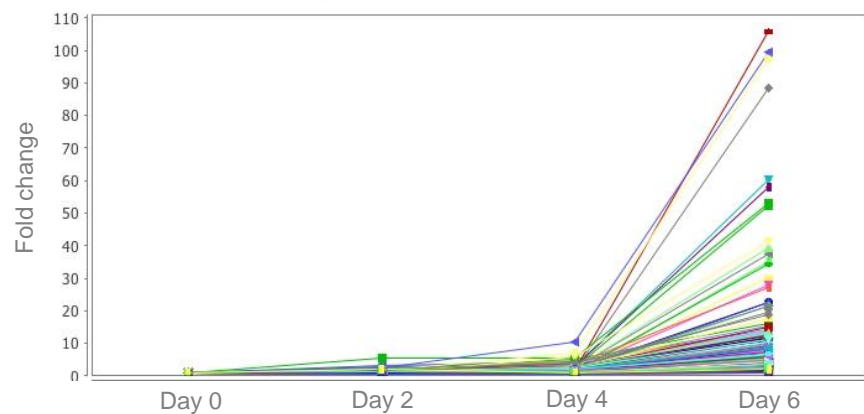

| Gene Set Name [# Genes (K)]                          | Description                                                       | # Genes in Overlap (k) | p value              |
|------------------------------------------------------|-------------------------------------------------------------------|------------------------|----------------------|
| REACTOME_CHEMOKINE_RECEPTORS_BINDING_CHEMOKINES [55] | Genes involved in chemokine receptors                             | 18                     | 5.33 e <sup>-9</sup> |
| BIOCARTA_LAIR_PATHWAY [17]                           | Cells and molecules involved in local acute inflammatory response | 8                      | 4.6 e <sup>-6</sup>  |
| BIOCARTA_CLASSIC_PATHWAY [14]                        | Classical complement pathway                                      | 7                      | 1.14 e <sup>-5</sup> |
| BIOCARTA_GRANULOCYTES_PATHWAY [14]                   | Adhesion and diapedesis of granulocytes                           | 7                      | 1.14 e <sup>-5</sup> |
| KEGG_CYTOKINE_CYTOKINE_RECEPTOR_INTERACTION [267]    | Cytokine-cytokine receptor interaction                            | 36                     | 2.31 e <sup>-5</sup> |
| BIOCARTA_MONOCYTE_PATHWAY [11]                       | Monocyte and its surface molecules                                | 6                      | 2.67 e <sup>-5</sup> |
| KEGG_COMPLEMENT_AND_COAGULATION_CASCADES [69]        | Complement and coagulation cascades                               | 15                     | 2.97 e <sup>-5</sup> |
| REACTOME_PEPTIDE_LIGAND_BINDING_RECEPTORS [173]      | Genes involved in peptide ligand-binding receptors                | 26                     | 5.21 e <sup>-5</sup> |
| KEGG_CHEMOKINE_SIGNALING_PATHWAY [190]               | Chemokine signaling pathway                                       | 27                     | 1.01 e <sup>-4</sup> |
| BIOCARTA_COMP_PATHWAY [19]                           | Complement pathway                                                | 7                      | 1.25 e <sup>-4</sup> |

CXCL1 CXCL16  
 CXCL2 CXCL3  
 CCL11 CXCL5  
 CCL2 CXCR7  
 CCL7  
 CXCL10  
 CXCL9  
 CCR5  
 CCR1  
 CCL19  
 CCR2  
 CXCL13
