# Supplementary material
Source: PubMed Central journal article supplement (PMC3780969)
Supplement: NIHMS397165-supplement-4.pdf [file NIHMS397165-supplement-4.pdf]

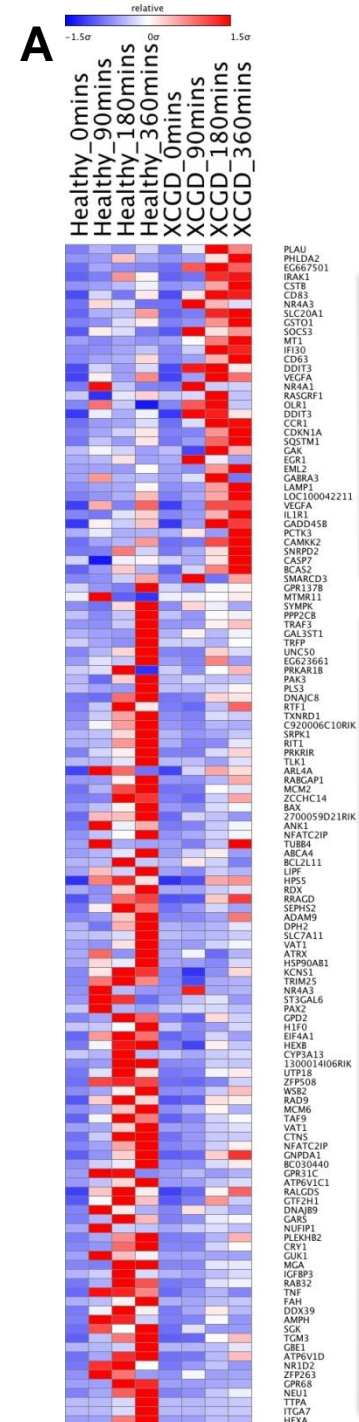

**B** Genes / Gene sets activated in the absence of ROS

| Gene Set Name [# Genes (K)]                              | Description                                               | # Genes in Overlap (k) | k/K | p value              |
|----------------------------------------------------------|-----------------------------------------------------------|------------------------|-----|----------------------|
| REACTOME_NF_KB_IS_ACTIVATED_AND_SIGNALNALS_SURVIVAL [10] | Genes involved in NF-kB is activated and signals survival | 2                      | █   | 8.84 e <sup>-4</sup> |
| REACTOME_P75NTR_RECRUITS_SIGNALLING_COMPLEXES [10]       | Genes involved in p75NTR recruits signalling complexes    | 2                      | █   | 8.84 e <sup>-4</sup> |
| REACTOME_P75NTR_SIGNALS_VIA_NFKB [13]                    | Genes involved in p75NTR signals via NF-kB                | 2                      | █   | 1.52 e <sup>-3</sup> |
| REACTOME_SIGNALLING_BY_NGF [215]                         | Genes involved in Signalling by NGF                       | 5                      | █   | 2.61 e <sup>-3</sup> |
| BIOCARTA_NFKB_PATHWAY [23]                               | NF-kB Signaling Pathway                                   | 2                      | █   | 4.79 e <sup>-3</sup> |
| REACTOME_P75_NTR_RECEPTOR_MEDIATED_SIGNALLING [82]       | Genes involved in p75 NTR receptor-mediated signalling    | 3                      | █   | 5.95 e <sup>-3</sup> |
| KEGG_MAPK_SIGNALING_PATHWAY [267]                        | MAPK signaling pathway                                    | 5                      | █   | 6.59 e <sup>-3</sup> |
| KEGG_APOPTOSIS [88]                                      | Apoptosis                                                 | 3                      | █   | 7.23 e <sup>-3</sup> |
| BIOCARTA_IL1R_PATHWAY [33]                               | Signal transduction through IL1R                          | 2                      | █   | 9.72 e <sup>-3</sup> |
| REACTOME_PI3K_AKT_SIGNALLING [37]                        | Genes involved in PI3K/AKT signalling                     | 2                      | █   | 1.21 e <sup>-2</sup> |

Genes underlying the enrichment signature

IRAK1  
SQSTM1  
RASGRF1  
NR4A1  
CDKN1A  
IL1R1  
GADD45B  
DDIT3  
CASP7

**C** Genes / Gene sets suppressed in the absence of ROS

| Gene Set Name [# Genes (K)]                                                    | Description                                                                         | # Genes in Overlap (k) | k/K | p value              |
|--------------------------------------------------------------------------------|-------------------------------------------------------------------------------------|------------------------|-----|----------------------|
| KEGG_OTHER_GLYCAN_DEGRADATION [16]                                             | Other glycan degradation                                                            | 3                      | █   | 7.57 e <sup>-4</sup> |
| REACTOME_UNWINDING_OF_DNA [11]                                                 | Genes involved in Unwinding of DNA                                                  | 2                      | █   | 6.84 e <sup>-3</sup> |
| SA_PROGRAMMED_CELL_DEATH [12]                                                  | Programmed cell death, or apoptosis, eliminates damaged or unneeded cells.          | 2                      | █   | 8.15 e <sup>-3</sup> |
| KEGG_GLYCOSPHINGOLIPID_BIOSYNTHESIS_GLOBO_SERIES [14]                          | Glycosphingolipid biosynthesis - globo series                                       | 2                      | █   | 1.11 e <sup>-2</sup> |
| KEGG_GLYCOSPHINGOLIPID_BIOSYNTHESIS_GANGLIO_SERIES [15]                        | Glycosphingolipid biosynthesis - ganglio series                                     | 2                      | █   | 1.27 e <sup>-2</sup> |
| KEGG_AMINO_SUGAR_AND_NUCLEOTIDE_SUGAR_AR_METABOLISM [44]                       | Amino sugar and nucleotide sugar metabolism                                         | 3                      | █   | 1.42 e <sup>-2</sup> |
| BIOCARTA_MCM_PATHWAY [18]                                                      | CDK Regulation of DNA Replication                                                   | 2                      | █   | 1.81 e <sup>-2</sup> |
| REACTOME_SYNTHESIS_AND_INTERCONVERSION_OF_NUCLEOTIDE_DI_AND_TRIPHOSPHATES [18] | Genes involved in Synthesis and interconversion of nucleotide di- and triphosphates | 2                      | █   | 1.81 e <sup>-2</sup> |
| KEGG_GLYCOSAMINOGLYCAN_DEGRADATION [21]                                        | Glycosaminoglycan degradation                                                       | 2                      | █   | 2.42 e <sup>-2</sup> |
| BIOCARTA_P53HYPOXIA_PATHWAY [23]                                               | Hypoxia and p53 in the Cardiovascular system                                        | 2                      | █   | 2.88 e <sup>-2</sup> |

Genes underlying the enrichment signature

HEXA  
HEXB  
NEU1  
MCM2  
MCM6  
BAX  
BCL2L11  
GNPDA1  
GUK1  
TXNRD1  
IGFBP3
